# Supplementary material
Source: Research Square preprint supplement (doi:10.21203/rs.3.rs-9880870/v1)
Supplement: Supplementary file 1 [file 75a0f047edd8f5cc30f35fb2.docx]

**Highlights**

- Paclitaxel and Piperine were formulated into NPs to enhance anticancer effects.
- The Pip-PTX NPs showed zeta potential of -30 to -40 mV, size <200 nm, and polydispersity index <0.3.
- Pip-PTX NPs suppressed MCF-7 breast cancer cell growth 3 times more than native drugs.
- Anchorage-dependent and -independent growth were inhibited by 7–8 folds; cell invasion reduced 3-fold.
- DNA fragmentation and morphology confirmed that Pip-PTX NPs penetrate cells and trigger apoptosis.
