# Supplementary material
Source: Research Square preprint supplement (doi:10.21203/rs.3.rs-9880870/v1)
Supplement: Supplementary file 2 [file 8b7b68ed267a03beb8a82f0c.docx]

Graphical Abstract


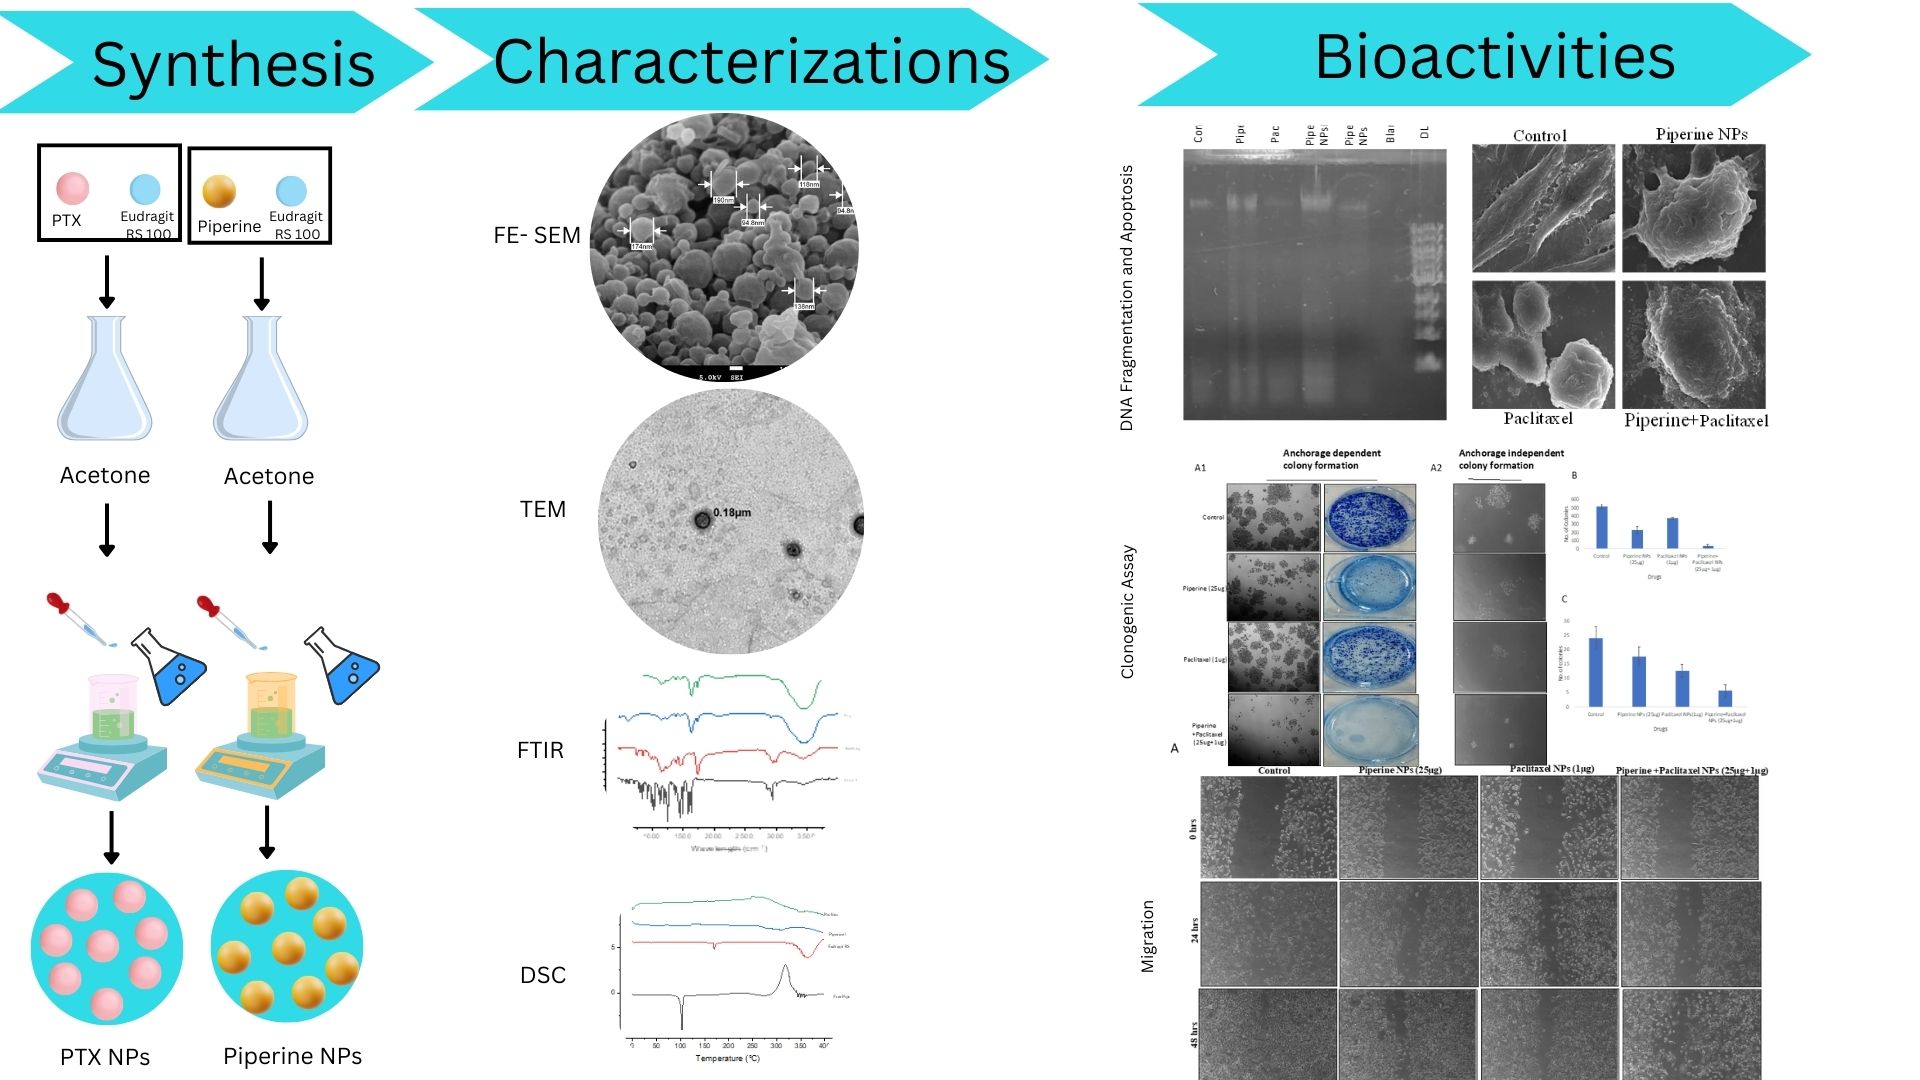


Graphical Abstract representing the synthesis, characterization and Results of Piperine and Paclitaxel nanoparticles
